# Supplementary material for: High-resolution structure of coexisting nanoscopic and microscopic lipid domains
Source: Royal Society of Chemistry journal article supplement (doi:10.1039/c6sm02727j), 2017-01-01
Supplement: c6sm02727j1.pdf [file c6sm02727j1.pdf]

## Supplementary material

### High-resolution structure of coexisting nanoscopic and microscopic lipid domains

Michal Belička, Anna Weitzer, and Georg Pabst

#### 1. Testing the model on DOPC bilayers

Our complex model for the analysis of coexisting  $L_O/L_D$  domains can be simplified to the case of a homogeneous bilayer by setting  $\Phi_D$  and  $p_D$  equal to 1. This allowed us to test its capabilities on the well-studied system of DOPC. Figure S1 shows the SAXS data obtained at 20 °C and Figure S2 the corresponding distribution functions of the structural components and the electron density profile.

Structural results, reported in Tab. S1 show that the obtained  $d = 62.3 \text{ \AA}$  is in a good agreement with  $d = 62.0 \text{ \AA}$  reported for oriented DOPC multibilayers<sup>1</sup> at the same temperature, but also with  $d = 63.1 \text{ \AA}$  obtained for MLVs at 30 °C, considering temperature induced swelling<sup>2</sup>. Qualitatively, a similar trend can be observed for  $\eta = 0.0551 \pm 2.0$  as compared to  $\eta \sim 0.1$  at 30 °C<sup>3,4</sup>. However, additionally also an improvement in data quality and modeling precision needs to be considered, which leads apparently to lower  $\eta$  values.

A comparison of  $A$  to literature values is given in the main text. The thickness of the hydrocarbon layer  $D_C$  is coupled to  $A$ , see Eq.

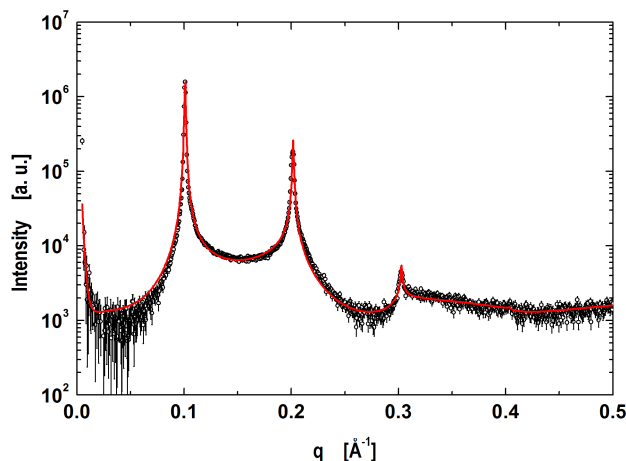

**Fig. S1** The SAXS curve of DOPC MLVs at 20 °C and the corresponding model fit (red line).

**Tab. S1** Structural parameters of DOPC MLVs. Parameter uncertainties are  $< 2\%$ .

| Parameter             | DOPC  |
|-----------------------|-------|
| $d$ [Å]               | 62.3  |
| $\eta$ [ $10^{-2}$ ]  | 5.51  |
| $\Delta_{fl}^*$ [Å]   | 4.65  |
| $N_{bil}$             | 29.46 |
| $A$ [Å <sup>2</sup> ] | 64.3  |
| $D_C^*$ [Å]           | 15.0  |
| $z_{GC}$ [Å]          | 15.75 |
| $z_{PCN}$ [Å]         | 19.75 |
| $\sigma_{CH_3}$ [Å]   | 3.0   |

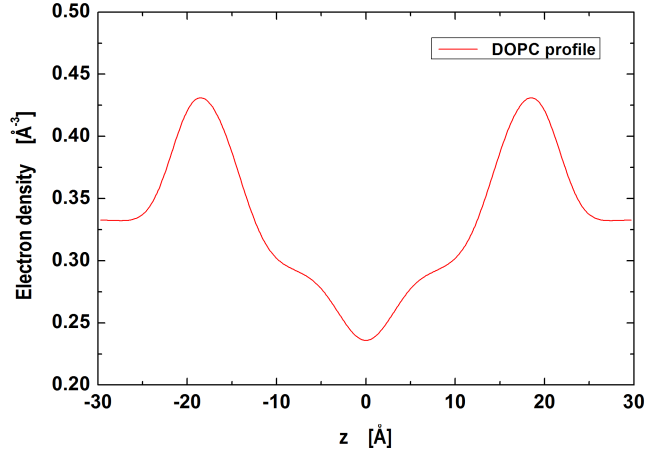

**Fig. S2** The DOPC electron density profile corresponding to the fit on Fig. S1.

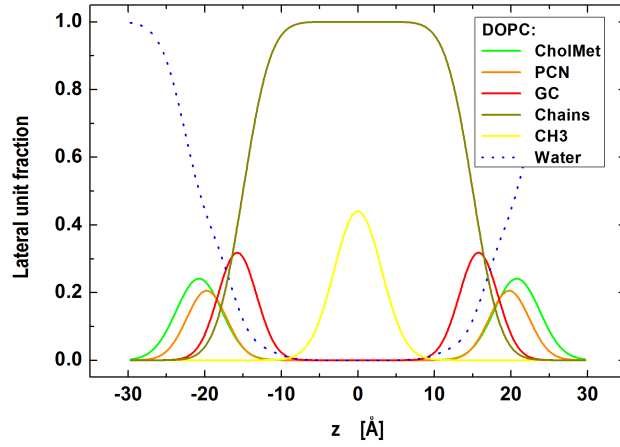

**Fig. S3** The DOPC component group structure (B) corresponding to the fit on Fig. S1.

## 2. Structure factor polydispersity

The number of spatially correlated bilayers in the whole system (nanoscopic regime) or separately in  $L_D$ - and  $L_O$ -dominated bilayer stacks (microscopic regime) was described by Schulz-Flory distribution

$$f_{Schulz}(N; N_{mean}) = \frac{1}{N_{mean}} \exp\left(-\frac{N}{N_{mean}}\right), \quad (1)$$

where  $N_{mean}$  is a mean number of spatially correlated bilayers in a given kind of stacks. The corresponding averaged structure factor  $S(q) = \langle S(q; N) \rangle_N$  was calculated as follows

$$S(q) = \langle S(q; N) \rangle_N = \frac{1}{C_{norm}} \cdot \sum_{m=2}^{N_{max}} f_{Schulz}(m; N_{mean}) S(q; m), \quad (2)$$

with

$$C_{norm} = \sum_{m=2}^{N_{max}} f(m; N_{mean}), \quad (3)$$

where  $N_{max} > 100$ .

### 3. Internal model parameters values

**Tab. S2** Supplied internal model parameters values used during fitting.  $\gamma_i$ 's are isobaric thermal expansivities used to calculate the corresponding molecular volumes of  $CH$  and  $CH_2$  groups for  $t = 22$  °C (see ref. 6 for further details).

| Parameter                                | Value                |
|------------------------------------------|----------------------|
| $V_{GC}$ [ $\text{\AA}^3$ ]              | 135.71 <sup>a)</sup> |
| $\sigma_{GC}$ [ $\text{\AA}$ ]           | 2.47 <sup>a)</sup>   |
| $V_{PCN}$ [ $\text{\AA}^3$ ]             | 95.99 <sup>a)</sup>  |
| $\sigma_{PCN}$ [ $\text{\AA}$ ]          | 2.63 <sup>a)</sup>   |
| $V_{ChoMet}$ [ $\text{\AA}^3$ ]          | 99.3 <sup>a)</sup>   |
| $\sigma_{ChoMet}$ [ $\text{\AA}$ ]       | 2.98 <sup>a)</sup>   |
| $\sigma_{HC}$ [ $\text{\AA}$ ]           | 2.44 <sup>a)</sup>   |
| $V_{CH_2}(L_D)$ [ $\text{\AA}^3$ ]       | 27.42 <sup>b)</sup>  |
| $\gamma_{CH_2}(L_D)$ [ $\text{K}^{-1}$ ] | 118.4 <sup>b)</sup>  |
| $V_{CH}(L_D)$ [ $\text{\AA}^3$ ]         | 22.17 <sup>b)</sup>  |
| $\gamma_{CH}(L_D)$ [ $\text{K}^{-1}$ ]   | 71.0 <sup>b)</sup>   |
| $V_{CH_2}(L_O)$ [ $\text{\AA}^3$ ]       | 27.42 <sup>c)</sup>  |
| $V_{Chol}(L_D)$ [ $\text{\AA}^3$ ]       | 628 <sup>d)</sup>    |

*References:*

- <sup>a)</sup> See ref. 5.
- <sup>b)</sup> See ref. 6.
- <sup>c)</sup> See ref. 7.
- <sup>d)</sup> See ref. 8.

### References

- [1] S. Costigan, P. Booth and R. Templer, *Biochim. Biophys. Acta, Biomembr.*, 2000, **1468**, 41–54.
- [2] G. Pabst, J. Katsaras, V. A. Raghunathan and M. Rappolt, *Langmuir*, 2003, **19**, 1716–1722.
- [3] S. Tristram-Nagle, H. I. Petrache and J. F. Nagle, *Biophys. J.*, 1998, **75**, 917–925.
- [4] P. Heftberger, B. Kollmitzer, F. A. Heberle, J. Pan, M. Rappolt, H. Amenitsch, N. Kučerka, J. Katsaras and G. Pabst, *J. Appl. Crystallogr.*, 2014, **47**, 173–180.
- [5] N. Kučerka, M.-P. Nieh and J. Katsaras, *Biochim. Biophys. Acta*, 2011, **1808**, 2761–2771.
- [6] D. Uhríková, P. Rybár, T. Hianik and P. Balgavý, *Chem. Phys. Lipids*, 2007, **145**, 97–105.
- [7] D. Marsh, *Handbook of Lipid Bilayers*, CRC Press, Boca Raton, 2nd edn, 2013.
- [8] J. Gallová, M. Klacsová, F. Devínsky and P. Balgavý, *Chem. Phys. Lipids*, 2015, **190**, 1–8.
